# Supplementary figures and images for: MiR-125b acts as an oncogene in glioblastoma cells and inhibits cell apoptosis through p53 and p38MAPK-independent pathways
Source: PubMed Central journal article supplement — Br J Cancer. 2013 Oct 29;109(11):2853–63. doi: 10.1038/bjc.2013.672 (PMC3844918; doi:10.1038/bjc.2013.672), 2013-10-29

Supplement Figure 1

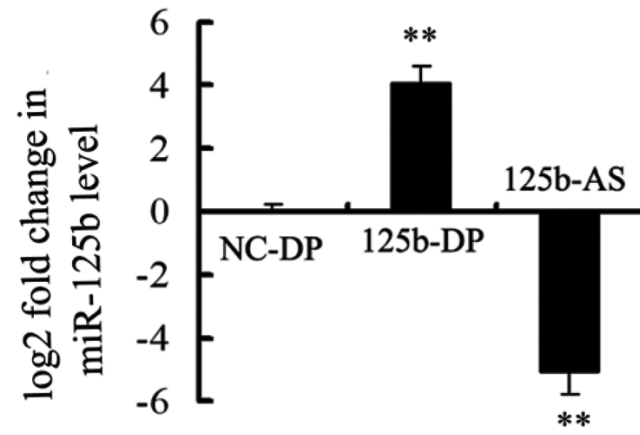

Supplement Figure 2

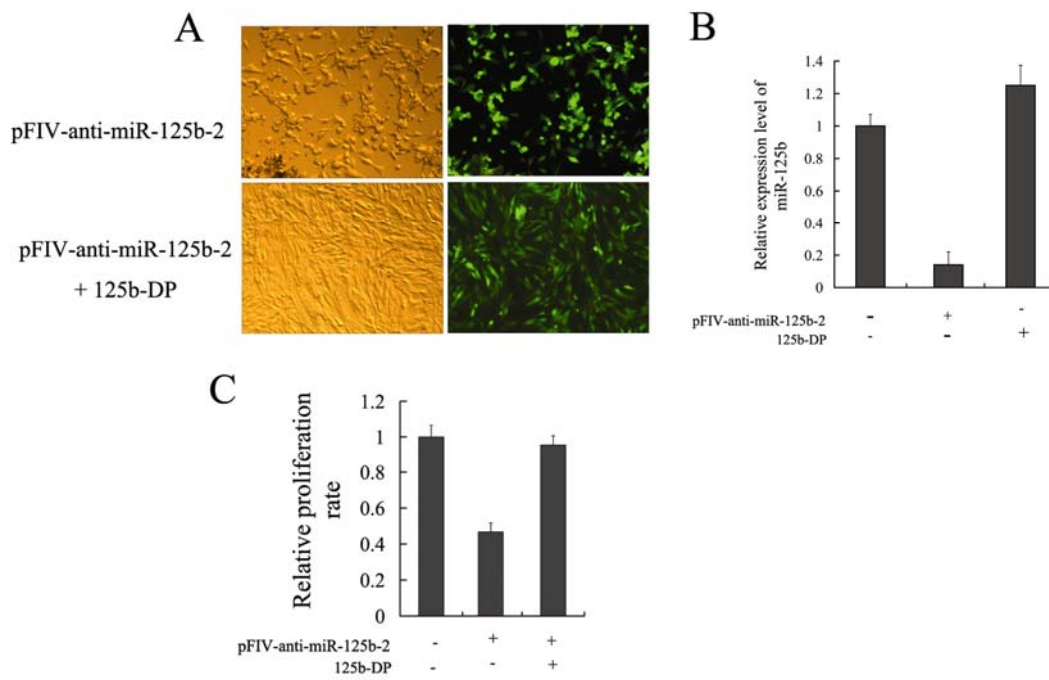

Supplement Figure 3

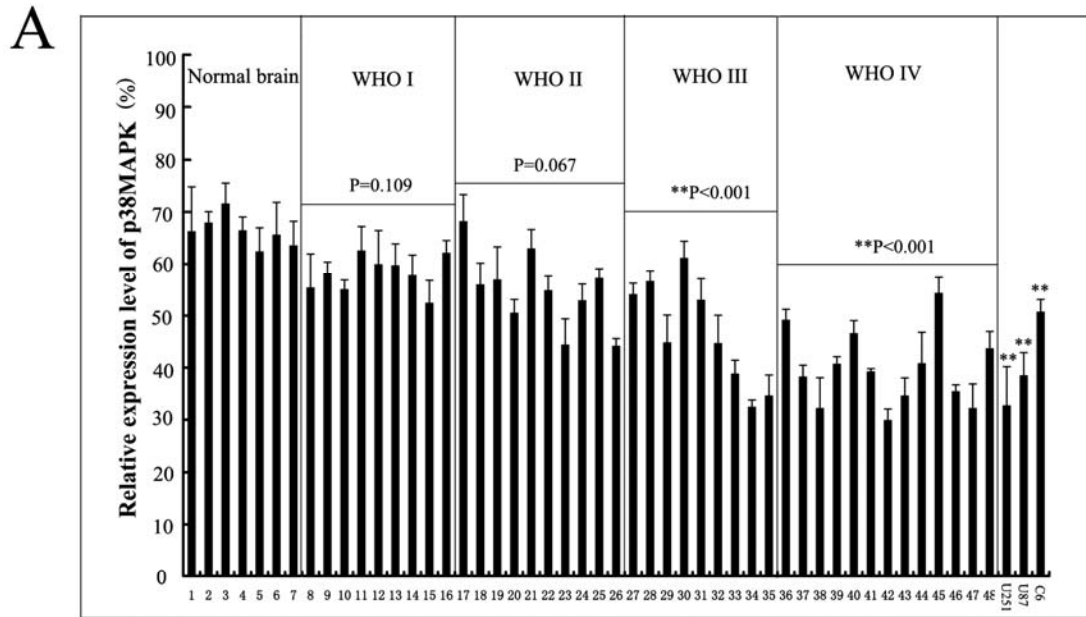

**B**

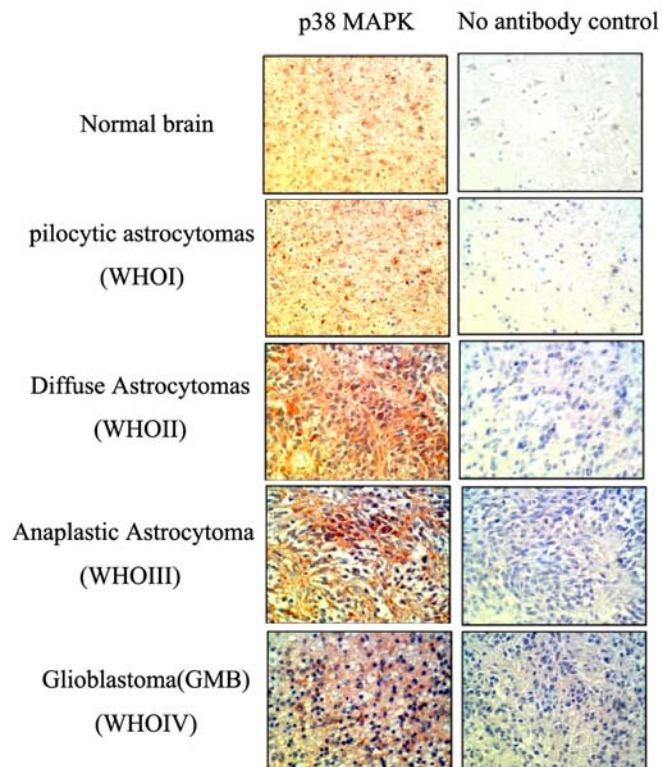

Supplement: bjc2013672x1.pdf [file bjc2013672x1.pdf]
